# Supplementary material for: Role of Traditional Cardiovascular Risk Factors after Initiation of Statin Therapy: A PharmLines Inception Cohort Study
Source: Cardiovasc Ther. 2022 May 24;2022:6587165. doi: 10.1155/2022/6587165 (PMC9155967; doi:10.1155/2022/6587165)
Supplement: Supplementary Materials — Supplement 1: the supplement consists of the R code used to determine the multivariable regularized hazard ratios (regularized Cox model, with elastic net penalty) and the implementation of the AUC calculation method. [file 6587165.f1.txt]

##Function by erikdrysdale.com/td_elnet

risksets <- function(So){
  n <- nrow(So)
  Y <- matrix(0,nrow=n,ncol=n)
  if(ncol(So) == 2){
    endtime <- So[,1]
    event <- So[,2]
    for (i in seq(n)){
      Y[i,] <- endtime[i] >= endtime
      
    }
  } else {
    starttime <- So[,1]
    endtime <- So[,2]
    event <- So[,3]
    for (i in seq(n)){
      Y[i,] <- (endtime[i]>=endtime) & (starttime[i] < endtime)
    }
  }
  return(Y)
}

softhresh <- function(x,t) {
sign(x) * pmax(abs(x) - t ,0)
}

Pfun <- function(Y,tY,eta){
  rsk <- exp(eta)
  haz <- as.vector(tY %*% rsk)
  Pmat <- outer(rsk,haz,'/')* Y
  return(Pmat)
}

resfun <- function(X,b,Y,tY,l, a, P,d,ll){
  eta <- as.vector(X %*% b)
  Phat <- P(Y,tY,eta)
  nll <- ll(Phat,d,b,l,a)
  res <- d - Phat %*% d
  return(list(res=res,nll=nll))
}

gradfun <- function(X, r, b, l, a){
  grad <- -t(X) %*% r / nrow(X) + l*(1-a)*b
  return(grad)
}

proxstep <- function(b, g, s, a, l){
  btilde <- b - s*g
  b2 <- softhresh(btilde, a*l*s)
  return(b2)
}

llfun <- function(P,d,b,l,a){
  -mean(log(diag(P)[d==1])) + l * (a*sum(abs(b)) + (1-a)*sum(b^2)/2)
}


bbstep <- function(b2,b1, g2, g1){
  sk <- b2 - b1
  yk <- g2 - g1
  gam <- max(sum(sk*yk)/sum(yk**2),sum(sk**2)/sum(sk*yk))
  return(gam)
}

elnet.prox.cox <- function(So,X,lambda,alpha=1,standardize=T,tol=1e-7,maxstep=1e4,bb=NULL,lammax=F){
  Y <- risksets(So)
  tY <- t(Y)
  n <- nrow(So)
  p <- ncol(X)
  if (ncol(So)==2){
    d <- So[,2]
  } else {
    d <- So[,3]
  }
  
  if (standardize){
    X <- scale(X)
    mu.X <- attr(X,'scaled:center')
    sd.X <- attr(X,'scaled:scale')
  } else {
    mu.X <- rep(0,p)
    sd.X <- rep(1,p)
  }
  
  if (is.null(bb)){
    bhat <- rep(0,p)
  } else {
    bhat <- bb
  }
  
  # Barzilai Borwein initialization
  res <- resfun(X,bhat,Y,tY,lambda,alpha,Pfun,d,llfun)
  grad <- gradfun(X, res$res,bhat,lambda,alpha)

  gtol <- max(abs(grad))
  if (alpha == 0) {
gtol <- gtol/1e-4
  } else {
gtol <- gtol / alpha
  }
  if (lammax) {
return(gtol)
  }
  if (lambda >= gtol) {
return(rep(0,p))
  }
  
  bhat.new <- proxstep(bhat,grad,0.01*gtol,alpha,lambda)
  res.new <- resfun(X,bhat.new,Y,tY,lambda,alpha,Pfun,d,llfun)
  grad.new <- gradfun(X, res.new$res, bhat.new,lambda,alpha)
  gam.new <- bbstep(bhat.new,bhat,grad.new,grad)
  
  ll.store <- c(res.new$nll, rep(NA,maxstep))
  gam.store <- c(gam.new,rep(NA,maxstep))
  diff <- 1; jj <- 1
  while (diff > tol & jj < maxstep){
    jj <- jj + 1
    bhat <- bhat.new
    res <- res.new
    grad <- grad.new
    gam <- gam.new
    
    bhat.new <- proxstep(bhat,grad,gam,alpha,lambda)
    res.new <- resfun(X,bhat.new,Y,tY,lambda,alpha,Pfun,d,llfun)
    grad.new <- gradfun(X, res.new$res, bhat.new,lambda,alpha)
    gam.new <- bbstep(bhat.new,bhat,grad.new,grad)
    
    ll.store[jj] <- res.new$nll
    gam.store[jj] <- gam.new
    diff <- sqrt(sum((bhat.new - bhat)^2)) / gam
  }
  
  bhat.scale <- as.vector(bhat/sd.X)
  err.KKT1 <- sum((grad.new[bhat != 0] - alpha*lambda)^2)
  err.KKT2 <- !any(abs(grad.new[bhat == 0]) >= alpha*lambda)
  stopifnot(err.KKT2)
  
  ll.store <- ll.store[!is.na(ll.store)]
  gam.store <- gam.store[!is.na(gam.store)]
  ret.list <- list(Y=Y, bhat = bhat.scale, err.KKT = err.KKT1, res=as.vector(res.new$res), jj=jj, ll=ll.store, gam=gam.store)
  
  return(ret.list)
}


cv.elnet.prox.cox <- function(So,X,lambda,alpha=1,nFolds=10,foldid=NULL,standardize=T,tol=1e-7,maxstep=1e4,lammax=F){
  
  if(is.null(foldid)){
    if(nFolds < 3){stop("Number of folds should be more than 2")}
    foldid <- sample(cut(seq(1,length(So)),breaks=nFolds,labels = F))
  } else {
    nFolds <- length(unique(foldid))
    if(nFolds < 3){stop("Number of folds should be more than 2")}
    if(length(foldid) != length(So)){
stop("foldid Should have the same length as y")
    }
  }
  
  nLambda <- length(lambda)
  nAlpha <- length(alpha)
  
  mean.CVE <- matrix(NA,nrow=nLambda,ncol=nAlpha)
  sd.CVE <- matrix(NA,nrow=nLambda,ncol=nAlpha)
  Y.full <- risksets(So)
  ifelse(ncol(So) == 2,d.full <- So[,2],d.full <- So[,3])
  wD <- as.vector(tapply(d.full,foldid,sum))

  pb <- txtProgressBar(min = 0, max=(nAlpha*nLambda*nFolds),style = 3)
  
  
  for(l in 1:nLambda){
    for(a in 1:nAlpha){
      model.list <- list()
      D <- c()
      for(k in 1:nFolds){
        X_k <- X[foldid != k,]
        So_k <- So[foldid != k,]
        Y_k <- risksets(So[foldid != k])
        ifelse(ncol(So)==2,d_k <- So[foldid != k,2],d_k <- So[foldid != k,3])
        model.list[[k]] <- elnet.prox.cox(X=X_k,So=So_k,lambda = lambda[l],alpha=alpha[a],standardize = standardize, tol = tol, maxstep = maxstep, lammax = lammax)
        if(is.list(model.list[[k]])){
          #cat("betahat",model.list[[k]]$bhat,"\n")
          P <- Pfun(Y_k,t(Y_k),as.vector(X_k %*% model.list[[k]]$bhat))
          P.f <- Pfun(Y.full,t(Y.full),as.vector(X %*% model.list[[k]]$bhat))
        } else {
          #cat("betahat",model.list[[k]],"\n")
          P <- Pfun(Y_k,t(Y_k),as.vector(X_k %*% model.list[[k]]))
          P.f <- Pfun(Y.full,t(Y.full),as.vector(X %*% model.list[[k]]))
        }
        ll.full <- sum(log(diag(P.f)[d.full==1]))
        ll.fold <- sum(log(diag(P)[d_k==1]))
        
        D[k] <- -2*(ll.full - ll.fold) / wD[k]
        #print(sum(!is.na(mean.CVE)))
        setTxtProgressBar(pb,(sum(!is.na(mean.CVE))*5+k))
        
      }
      #print(D)
      mean.CVE[l,a] <- weighted.mean(D,wD)
      sd.CVE[l,a] <- sqrt(weighted.mean(scale(D,mean.CVE[l,a],FALSE)^2, wD)/(nFolds-1))
      
    }
  }
  lambda.min = lambda[which(mean.CVE == min(mean.CVE),arr=T)[1]]
  alpha.min = alpha[which(mean.CVE == min(mean.CVE),arr=T)[2]]
  min.model <- elnet.prox.cox(X=X,So=So,lambda = lambda.min,alpha=alpha.min,standardize = standardize, tol = tol, maxstep = maxstep, lammax = lammax)
  
  return(list(mean.CVE=mean.CVE,sd.CVE=sd.CVE,lambda=lambda,alpha=alpha,lambda.min=lambda.min,alpha.min=alpha.min,foldid=foldid,min.model=min.model))
}


AUC.dep.cd <- function(Surv.rsp, Surv.rsp.new = NULL, lp, lpnew, times){
  stime <- Surv.rsp[, 2]
  event <- Surv.rsp[, 3]
  if (!is.null(Surv.rsp.new)) {
    stime.new <- Surv.rsp.new[, 2]
    event.new <- Surv.rsp.new[, 3]
  }
  else {
    stime.new <- NULL
    event.new <- NULL
  }
  n_stime <- length(stime)
  n_lp <- length(lp)
  n_lpnew <- length(lpnew)
  nN <- length(event.new) - sum(event.new)
  nA <- sum(event.new)
  
  erg <- .Call("Cham_Diao", as.numeric(lp), as.numeric(times), 
               as.numeric(stime), as.numeric(event), as.integer(n_stime), 
               as.numeric(stime.new), as.numeric(event.new), as.integer(length(stime.new)), 
               as.integer(n_lp), as.numeric(lpnew), as.integer(n_lpnew), 
               PACKAGE = "survAUC")

  Q1 <- erg$auc/(2-erg$auc) - erg$auc^2
  Q2 <- 2 * erg$auc^2 / (1 + erg$auc) - erg$auc^2
  stderr <- sqrt((erg$auc * (1 - erg$auc) + (nA - 1) * Q1 + (nN - 1) * Q2)/(nA * nN))
  CI_LB <- erg$auc + qnorm(0.025) * stderr
  CI_UB <- erg$auc + qnorm(0.975) * stderr
  return(list(times=erg$times,auc=erg$auc,auc.stderr = stderr, CI_low = CI_LB, CI_up = CI_UB))
}
